# Supplementary material for: AAV1.NT-3 gene therapy prevents age-related sarcopenia
Source: publisher site journal article supplement (doi:10.18632/aging.204577), 2023-03-09
Supplement: Supplementary file [file aging-v15i5-204577-supplementary-material-SD2.pdf]

## SUPPLEMENTARY TABLES

**Supplementary Table 1. Fiber size analysis on tibialis anterior muscle of NT-3 treated and untreated C57BL/6 mice.**

|            | WT (10 mo, <i>n</i> = 8) | Untreated ( <i>n</i> = 8) | NT-3 Treated ( <i>n</i> = 9) |
|------------|--------------------------|---------------------------|------------------------------|
|            | Diameter (μm)            | Diameter (μm)             | Diameter (μm)                |
| STO        | 30.49 ± 1.0              | 26.85 ± 0.5 <sup>#</sup>  | 30.43 ± 0.9 <sup>*</sup>     |
| FTO        | 36.33 ± 1.1              | 33.97 ± 0.8               | 37.98 ± 1.3 <sup>*</sup>     |
| FTG        | 41.54 ± 2.0              | 37.08 ± 1.0 <sup>##</sup> | 42.31 ± 1.1 <sup>***</sup>   |
| All Fibers | 37.23 ± 0.9              | 33.27 ± 0.8 <sup>#</sup>  | 37.46 ± 0.9 <sup>**</sup>    |

Data represented as mean ± SEM. <sup>\*</sup>*p* < 0.05, <sup>\*\*</sup>*p* < 0.01, <sup>\*\*\*</sup>*p* < 0.001, <sup>\*\*\*\*</sup>*p* < 0.0001 (compared to UT), <sup>#</sup>*p* < 0.05, <sup>##</sup>*p* < 0.01 (compared to WT-10 mo), 2-way ANOVA, Tukey's multiple comparison test.

**Supplementary Table 2. Fiber size analysis on tibialis anterior muscle of NT-3 treated and untreated C57BL/6 female mice.**

|            | WT (10 mo, <i>n</i> = 4) | Untreated ( <i>n</i> = 4) | NT-3 Treated ( <i>n</i> = 5) |
|------------|--------------------------|---------------------------|------------------------------|
|            | Diameter (μm)            | Diameter (μm)             | Diameter (μm)                |
| STO        | 27.98 ± 0.5              | 27.22 ± 0.9               | 30.41 ± 0.8                  |
| FTO        | 34.61 ± 1.7              | 33.44 ± 1.3               | 37.79 ± 2.0                  |
| FTG        | 40.89 ± 1.2              | 35.54 ± 1.4 <sup>#</sup>  | 42.13 ± 1.3 <sup>**</sup>    |
| All Fibers | 35.26 ± 0.9              | 32.20 ± 1.0               | 36.95 ± 1.1 <sup>*</sup>     |

Data represented as mean ± SEM. <sup>\*</sup>*p* < 0.05, <sup>\*\*</sup>*p* < 0.01, <sup>\*\*\*</sup>*p* < 0.001, <sup>\*\*\*\*</sup>*p* < 0.0001 (compared to UT), <sup>#</sup>*p* < 0.05, <sup>##</sup>*p* < 0.01 (compared to WT-10 mo), 2-way ANOVA, Tukey's multiple comparison test.

**Supplementary Table 3. Fiber size analysis on tibialis anterior muscle of NT-3 treated and untreated C57BL/6 male mice.**

|            | WT (10 mo, <i>n</i> = 4) | Untreated ( <i>n</i> = 4) | NT-3 Treated ( <i>n</i> = 4) |
|------------|--------------------------|---------------------------|------------------------------|
|            | Diameter (μm)            | Diameter (μm)             | Diameter (μm)                |
| STO        | 33.00 ± 0.5              | 26.48 ± 0.6 <sup>##</sup> | 30.46 ± 2.0                  |
| FTO        | 38.04 ± 0.9              | 34.50 ± 1.1               | 38.72 ± 1.9                  |
| FTG        | 42.19 ± 0.5              | 38.56 ± 0.8               | 42.54 ± 2.1                  |
| All Fibers | 39.20 ± 0.4              | 34.33 ± 0.9 <sup>#</sup>  | 38.09 ± 1.7                  |

Data represented as mean ± SEM. <sup>\*</sup>*p* < 0.05, <sup>\*\*</sup>*p* < 0.01, <sup>\*\*\*</sup>*p* < 0.001, <sup>\*\*\*\*</sup>*p* < 0.0001 (compared to UT), <sup>#</sup>*p* < 0.05, <sup>##</sup>*p* < 0.01 (compared to WT-10 mo), 2-way ANOVA, Tukey's multiple comparison test.

**Supplementary Table 4. Fiber size analysis on gastrocnemius muscle of NT-3 treated and untreated C57BL/6 mice.**

|            | WT (10 mo, <i>n</i> = 8) | Untreated ( <i>n</i> = 6)  | NT-3 Treated ( <i>n</i> = 5) |
|------------|--------------------------|----------------------------|------------------------------|
|            | Diameter (μm)            | Diameter (μm)              | Diameter (μm)                |
| STO        | 29.96 ± 0.7              | 27.65 ± 1.3                | 29.39 ± 0.9                  |
| FTO        | 34.07 ± 0.7              | 31.53 ± 0.8                | 33.23 ± 1.3                  |
| FTG        | 41.19 ± 1.0              | 35.54 ± 1.3 <sup>###</sup> | 36.43 ± 1.3 <sup>##</sup>    |
| All Fibers | 36.51 ± 0.8              | 32.52 ± 1.2 <sup>#</sup>   | 33.66 ± 0.8                  |

Data represented as mean ± SEM. <sup>\*</sup>*p* < 0.05, <sup>\*\*</sup>*p* < 0.01, <sup>\*\*\*</sup>*p* < 0.001, <sup>\*\*\*\*</sup>*p* < 0.0001 (compared to UT), <sup>#</sup>*p* < 0.05, <sup>##</sup>*p* < 0.01 (compared to WT-10 mo), 2-way ANOVA, Tukey's multiple comparison test.

**Supplementary Table 5. Fiber size analysis on gastrocnemius muscle of NT-3 treated and untreated C57BL/6 female mice.**

|            | WT (10 mo, <i>n</i> = 4) | Untreated ( <i>n</i> = 3) | NT-3 Treated ( <i>n</i> = 2) |
|------------|--------------------------|---------------------------|------------------------------|
|            | Diameter (μm)            | Diameter (μm)             | Diameter (μm)                |
| STO        | 28.69 ± 0.5              | 25.51 ± 0.1               | 30.66 ± 0.1*                 |
| FTO        | 32.67 ± 0.3              | 30.24 ± 1.1               | 31.33 ± 2.2                  |
| FTG        | 39.17 ± 0.5              | 33.30 ± 1.2##             | 37.18 ± 3.2                  |
| All Fibers | 34.97 ± 0.5              | 30.35 ± 0.8##             | 33.59 ± 1.7                  |

Data represented as mean ± SEM. \**p* < 0.05, \*\**p* < 0.01, \*\*\**p* < 0.001, \*\*\*\**p* < 0.0001 (compared to UT), #*p* < 0.05, ##*p* < 0.01 (compared to WT-10 mo), 2-way ANOVA, Tukey's multiple comparison test.

**Supplementary Table 6. Fiber size analysis on gastrocnemius muscle of NT-3 treated and untreated C57BL/6 male mice.**

|            | WT (10 mo, <i>n</i> = 4) | Untreated ( <i>n</i> = 3) | NT-3 Treated ( <i>n</i> = 3) |
|------------|--------------------------|---------------------------|------------------------------|
|            | Diameter (μm)            | Diameter (μm)             | Diameter (μm)                |
| STO        | 31.24 ± 0.9              | 29.79 ± 1.8               | 28.55 ± 1.3                  |
| FTO        | 36.32 ± 1.0              | 32.82 ± 0.6               | 34.50 ± 1.4                  |
| FTG        | 43.20 ± 1.3              | 37.78 ± 1.7#              | 35.94 ± 1.4###               |
| All Fibers | 38.04 ± 0.9              | 34.70 ± 1.2               | 33.71 ± 1.2                  |

Data represented as mean ± SEM. \**p* < 0.05, \*\**p* < 0.01, \*\*\**p* < 0.001, \*\*\*\**p* < 0.0001 (compared to UT), #*p* < 0.05, ##*p* < 0.01 (compared to WT-10 mo), 2-way ANOVA, Tukey's multiple comparison test.

**Supplementary Table 7. Fiber size analysis on quadriceps muscle of NT-3 treated and untreated C57BL/6 mice.**

|            | WT (10 mo, <i>n</i> = 7) | Untreated ( <i>n</i> = 6) | NT-3 Treated ( <i>n</i> = 4) |
|------------|--------------------------|---------------------------|------------------------------|
|            | Diameter (μm)            | Diameter (μm)             | Diameter (μm)                |
| STO        | 31.66 ± 1.0              | 27.60 ± 1.3#              | 31.06 ± 0.6                  |
| FTO        | 37.59 ± 0.8              | 32.72 ± 1.5#              | 35.83 ± 0.9                  |
| FTG        | 46.56 ± 1.4              | 35.06 ± 1.0####           | 37.47 ± 1.8####              |
| All Fibers | 42.02 ± 1.3              | 33.35 ± 1.0####           | 35.11 ± 1.2##                |

Data represented as mean ± SEM. \**p* < 0.05, \*\**p* < 0.01, \*\*\**p* < 0.001, \*\*\*\**p* < 0.0001 (compared to UT), #*p* < 0.05, ##*p* < 0.01 (compared to WT-10 mo), 2-way ANOVA, Tukey's multiple comparison test.

**Supplementary Table 8. Fiber size analysis on quadriceps muscle of NT-3 treated and untreated C57BL/6 female mice.**

|            | WT (10 mo, <i>n</i> = 3) | Untreated ( <i>n</i> = 4) | NT-3 Treated ( <i>n</i> = 2) |
|------------|--------------------------|---------------------------|------------------------------|
|            | Diameter (μm)            | Diameter (μm)             | Diameter (μm)                |
| STO        | 30.19 ± 1.4              | 27.72 ± 1.9               | 31.06 ± 0.5                  |
| FTO        | 35.36 ± 0.3              | 31.19 ± 1.8               | 34.73 ± 1.5                  |
| FTG        | 43.23 ± 0.6              | 34.01 ± 1.1               | 35.37 ± 1.7                  |
| All Fibers | 38.87 ± 1.0              | 32.55 ± 1.3#              | 34.09 ± 0.9                  |

Data represented as mean ± SEM. \**p* < 0.05, \*\**p* < 0.01, \*\*\**p* < 0.001, \*\*\*\**p* < 0.0001 (compared to UT), #*p* < 0.05, ##*p* < 0.01 (compared to WT-10 mo), 2-way ANOVA, Tukey's multiple comparison test.

**Supplementary Table 9. Fiber size analysis on quadriceps muscle of NT-3 treated and untreated C57BL/6 male mice.**

|                   | WT (10 mo, <i>n</i> = 4) | Untreated ( <i>n</i> = 2)  | NT-3 Treated ( <i>n</i> = 2) |
|-------------------|--------------------------|----------------------------|------------------------------|
|                   | Diameter (μm)            | Diameter (μm)              | Diameter (μm)                |
| <b>STO</b>        | 32.77 ± 0.8              | 27.35 ± 1.4                | 31.07 ± 1.3                  |
| <b>FTO</b>        | 40.61 ± 0.2              | 35.80 ± 1.2                | 36.94 ± 0.5                  |
| <b>FTG</b>        | 49.06 ± 1.3              | 37.16 ± 1.0                | 39.58 ± 2.9                  |
| <b>All Fibers</b> | 44.38 ± 0.9              | 34.95 ± 0.4 <sup>###</sup> | 36.14 ± 2.3 <sup>##</sup>    |

Data represented as mean ± SEM. \**p* < 0.05, \*\**p* < 0.01, \*\*\**p* < 0.001, \*\*\*\**p* < 0.0001 (compared to UT), #*p* < 0.05, ##*p* < 0.01 (compared to WT-10 mo), 2-way ANOVA, Tukey's multiple comparison test.

**Supplementary Table 10. Fiber size analysis on triceps muscle of NT-3 treated and untreated C57BL/6 mice.**

|                   | WT (10 mo, <i>n</i> = 8) | Untreated ( <i>n</i> = 8) | NT-3 Treated ( <i>n</i> = 9) |
|-------------------|--------------------------|---------------------------|------------------------------|
|                   | Diameter (μm)            | Diameter (μm)             | Diameter (μm)                |
| <b>STO</b>        | 26.22 ± 0.7              | 27.10 ± 1.1               | 28.87 ± 1.0                  |
| <b>FTO</b>        | 33.32 ± 0.7              | 35.46 ± 1.6               | 39.01 ± 1.8 <sup>#</sup>     |
| <b>FTG</b>        | 43.50 ± 1.1              | 41.31 ± 1.1               | 43.65 ± 2.1                  |
| <b>All Fibers</b> | 37.70 ± 0.8              | 35.92 ± 1.2               | 37.18 ± 1.6                  |

Data represented as mean ± SEM. \**p* < 0.05, \*\**p* < 0.01, \*\*\**p* < 0.001, \*\*\*\**p* < 0.0001 (compared to UT), #*p* < 0.05, ##*p* < 0.01 (compared to WT-10 mo), 2-way ANOVA, Tukey's multiple comparison test.

**Supplementary Table 11. Fiber size analysis on triceps muscle of NT-3 treated and untreated C57BL/6 female mice.**

|                   | WT (10 mo, <i>n</i> = 4) | Untreated ( <i>n</i> = 4) | NT-3 Treated ( <i>n</i> = 5) |
|-------------------|--------------------------|---------------------------|------------------------------|
|                   | Diameter (μm)            | Diameter (μm)             | Diameter (μm)                |
| <b>STO</b>        | 25.88 ± 1.1              | 25.21 ± 1.3               | 27.85 ± 1.6                  |
| <b>FTO</b>        | 35.35 ± 0.5              | 32.51 ± 1.8               | 36.02 ± 2.3                  |
| <b>FTG</b>        | 41.22 ± 1.0              | 38.69 ± 1.0               | 39.43 ± 2.0                  |
| <b>All Fibers</b> | 35.96 ± 1.0              | 33.17 ± 1.1               | 33.90 ± 1.3                  |

Data represented as mean ± SEM. \**p* < 0.05, \*\**p* < 0.01, \*\*\**p* < 0.001, \*\*\*\**p* < 0.0001 (compared to UT), #*p* < 0.05, ##*p* < 0.01 (compared to WT-10 mo), 2-way ANOVA, Tukey's multiple comparison test.

**Supplementary Table 12. Fiber size analysis on triceps muscle of NT-3 treated and untreated C57BL/6 male mice.**

|                   | WT (10 mo, <i>n</i> = 4) | Untreated ( <i>n</i> = 4) | NT-3 Treated ( <i>n</i> = 4) |
|-------------------|--------------------------|---------------------------|------------------------------|
|                   | Diameter (μm)            | Diameter (μm)             | Diameter (μm)                |
| <b>STO</b>        | 26.57 ± 0.8              | 28.98 ± 1.1               | 30.14 ± 0.6                  |
| <b>FTO</b>        | 34.29 ± 1.1              | 38.41 ± 1.5               | 42.75 ± 1.3 <sup>*###</sup>  |
| <b>FTG</b>        | 45.77 ± 1.2              | 43.93 ± 0.6               | 48.93 ± 1.5 <sup>*</sup>     |
| <b>All Fibers</b> | 39.45 ± 0.6              | 38.66 ± 0.8               | 41.26 ± 1.2                  |

Data represented as mean ± SEM. \**p* < 0.05, \*\**p* < 0.01, \*\*\**p* < 0.001, \*\*\*\**p* < 0.0001 (compared to UT), #*p* < 0.05, ##*p* < 0.01 (compared to WT-10 mo), 2-way ANOVA, Tukey's multiple comparison test.
